# Supplementary material for: Formation of disinfection byproducts in wash water and lettuce by washing with sodium hypochlorite and peracetic acid sanitizers
Source: PubMed Central journal article supplement — Food Chem X. 2018 Dec 21;1:100003. doi: 10.1016/j.fochx.2018.100003 (PMC6694845; doi:10.1016/j.fochx.2018.100003), 2018-12-21
Supplement: mmc1.pdf [file mmc1.pdf]

## Supporting Information

### **Formation of disinfection byproducts in wash water and lettuce by washing with sodium hypochlorite and peracetic acid sanitizers**

Wan-Ning Lee and Ching-Hua Huang\*

*School of Civil and Environmental Engineering, Georgia Institute of Technology, 200 Bobby Dodd  
Way, Atlanta, GA 30332, USA*

\* Corresponding author.

*Email addresses: [wlee313@gatech.edu](mailto:wlee313@gatech.edu) (W.-N. Lee), [ching-hua.huang@ce.gatech.edu](mailto:ching-hua.huang@ce.gatech.edu) (C.-H. Huang)*

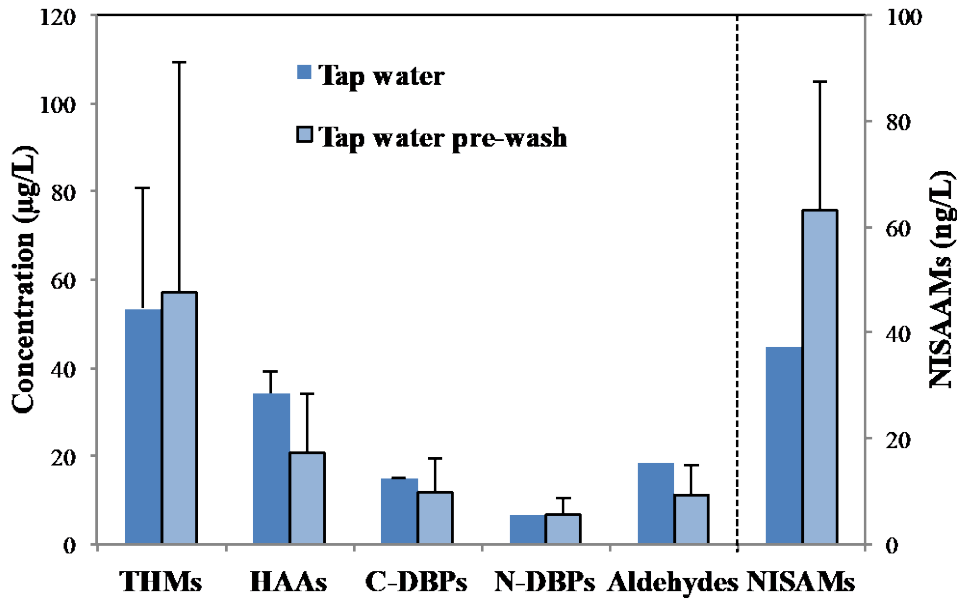

**Figure S1.** DBPs levels in the original tap water (n = 2) and in the “pre-wash” water sample generated after pre-washing lettuce by tap water for 10 min (n = 4).

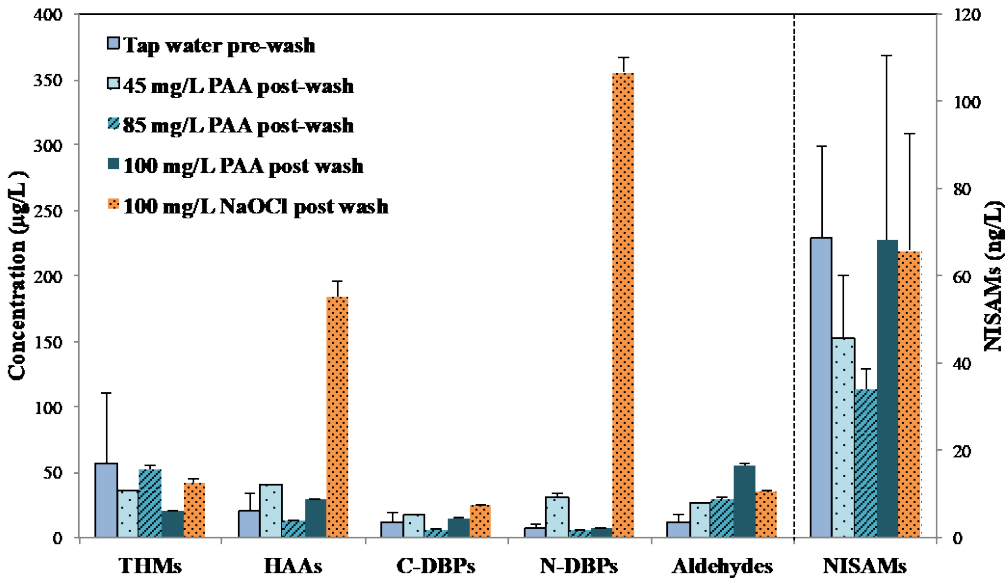

**Figure S2.** Concentrations of DBPs in the wash water from tap water pre-wash of fresh-cut lettuce (n = 4), and tap water post-wash from different sanitizer washes (n = 2 for each experiment).

**Table S1.** Retention time, recovery and MDL in lettuce wash water and lettuce for five target aldehydes (n = 8).

| Aldehydes | Retention Time<br>(RSD%) (min) | Lettuce Wash Water     |                            | Lettuce                |               |
|-----------|--------------------------------|------------------------|----------------------------|------------------------|---------------|
|           |                                | Recovery<br>(RSD%) (%) | MDL<br>( $\mu\text{g/L}$ ) | Recovery<br>(RSD%) (%) | MDL<br>(ng/g) |
| FD        | 16.78 (0.04)                   | 185 (7.2)              | 0.65                       | 205 (7.4)              | 9.03          |
| AD        | 20.43 (0.00)                   | 241 (2.3)              | 1.88                       | 249 (1.0)              | 1.48          |
| BD        | 39.57 (0.02)                   | 176 (1.0)              | 1.79                       | 53 (0.3)               | 0.10          |
| GX        | 45.17 (0.00),<br>45.32 (0.01)  | 162 (5.4)              | 0.13                       | 193 (10.6)             | 0.80          |
| MG        | 45.32 (0.01),<br>45.78 (0.00)  | 152 (0.2)              | 0.47                       | 52 (3.9)               | 1.21          |

**Table S2.** Recovery and estimated MDL in lettuce for six target nitrosamines (n = 3).

| NISAMs | Recovery (RSD%) (%) | Estimated MDL (ng/g) |
|--------|---------------------|----------------------|
| NDMA   | 26 (8.4)            | 0.1                  |
| NMEA   | 52 (3.0)            | 0.25                 |
| NDEA   | 81 (2.1)            | 0.1                  |
| NDPA   | 82 (2.7)            | 0.1                  |
| NMOR   | 52 (5.2)            | 0.1                  |
| NPYR   | 57 (3.6)            | 0.1                  |

**Table S3.** Concentrations of DBPs in wash water after washing fresh-cut lettuce. Wash water samples included tap water **pre-wash** (20 °C) and then **sanitizer wash** (PAA or NaOCl, 5 °C, pH 6). ND = non-detectable.

| DBP Group        | DBP compound     | Pre-wash (by tap water) | PAA 45 mg/L       | PAA 85 mg/L       | PAA 100 mg/L     | NaOCl 100 mg/L   |
|------------------|------------------|-------------------------|-------------------|-------------------|------------------|------------------|
| THMs (µg/L)      | CF               | <b>48.5±51.7</b>        | <b>49.4±0.54</b>  | <b>63.6±1.09</b>  | <b>3.39±0.56</b> | <b>25.0±4.90</b> |
|                  | BF               | <MDL                    | <MDL              | <MDL              | <MDL             | <MDL             |
|                  | BDCM             | 7.55±0.77               | 0.13±0.002        | 0.16±0.01         | 0.02±0.01        | 0.24±0.06        |
|                  | DBCM             | 1.08±0.15               | ND                | ND                | ND               | 0.18±0.01        |
|                  | <b>Total</b>     | <b>57.1±52.4</b>        | <b>49.6±0.55</b>  | <b>63.8±1.08</b>  | <b>3.41±0.55</b> | <b>25.4±4.96</b> |
| HAAs (µg/L)      | MCAA             | 0.69±0.56               | 0.26±0.04         | 0.24±0.002        | 0.38±0.04        | 1.97±0.11        |
|                  | MBAA             | 0.19                    | <MDL              | <MDL              | 0.28±0.01        | 0.41±0.04        |
|                  | DCAA             | 7.13±6.05               | 0.70±0.008        | 0.31±0.008        | 0.41±0.02        | <b>83.1±0.54</b> |
|                  | TCAA             | <b>9.84±5.47</b>        | <b>0.89±0.001</b> | <b>0.54±0.05</b>  | <b>0.72±0.03</b> | 36.1±0.28        |
|                  | BCAA             | 1.33±1.09               | 0.30±0.002        | <MDL              | 0.28±0.02        | 13.7±0.24        |
|                  | DBAA             | <MDL                    | <MDL              | <MDL              | <MDL             | 5.13±0.001       |
|                  | BDCAA            | 1.17±0.66               | <MDL              | <MDL              | <MDL             | 31.1±1.13        |
|                  | CDBAA            | ND                      | ND                | ND                | ND               | 6.06±0.32        |
|                  | TBAA             | 0.75±0.33               | <MDL              | <MDL              | <MDL             | 44.7±1.94        |
|                  | <b>Total</b>     | <b>21.0±13.2</b>        | <b>2.16±0.05</b>  | <b>1.09±0.04</b>  | <b>2.08±0.11</b> | <b>222±2.27</b>  |
| C-DBPs (µg/L)    | CH               | <b>9.48±6.18</b>        | <MDL              | <MDL              | <b>0.24±0.04</b> | <b>36.2±0.36</b> |
|                  | DCPN             | 0.48±0.19               | ND                | ND                | ND               | 1.93±0.32        |
|                  | TCPN             | 1.06±0.82               | ND                | ND                | ND               | 7.86±0.78        |
|                  | TetraCPN         | ND                      | ND                | ND                | ND               | 0.67             |
|                  | PentaCPN         | ND                      | ND                | ND                | ND               | 1.74±0.26        |
|                  | DBCPCN           | <MDL                    | ND                | <MDL              | <MDL             | <MDL             |
|                  | TriCE            | ND                      | ND                | ND                | ND               | 0.97±0.31        |
|                  | TCE              | ND                      | ND                | ND                | ND               | ND               |
|                  | TCEL             | ND                      | ND                | ND                | ND               | ND               |
|                  | CTC              | <MDL                    | ND                | ND                | ND               | ND               |
|                  | DBE              | 1.08±0.91               | <MDL              | ND                | ND               | 0.41             |
|                  | <b>Total</b>     | <b>11.9±7.55</b>        | <b>&lt;MDL</b>    | <b>&lt;MDL</b>    | <b>&lt;MDL</b>   | <b>49.2±2.07</b> |
|                  | N-DBPs (µg/L)    | BNM                     | ND                | ND                | <MDL             | <MDL             |
| TCNM             |                  | 0.30±0.19               | <b>0.15±0.00</b>  | <b>0.16±0.001</b> | 0.15±0.004       | 0.35±0.03        |
| DCAN             |                  | 1.67±0.76               | <MDL              | ND                | ND               | <b>79.8±8.42</b> |
| TCAN             |                  | <MDL                    | ND                | ND                | ND               | 0.61±0.23        |
| BCAN             |                  | 0.50±0.11               | ND                | ND                | ND               | 3.31±0.17        |
| DBAN             |                  | <MDL                    | <MDL              | <MDL              | <MDL             | <MDL             |
| DCAAm            |                  | <b>3.56±3.26</b>        | ND                | ND                | <b>0.32±0.03</b> | 50.0±3.01        |
| TCAAm            |                  | 0.78±0.02               | ND                | ND                | <MDL             | 10.6±1.22        |
| <b>Total</b>     | <b>6.68±4.20</b> | <b>0.15±0.00</b>        | <b>0.20±0.004</b> | <b>0.47±0.03</b>  | <b>145±6.20</b>  |                  |
| NISAMs (ng/L)    | NDMA             | ND                      | ND                | ND                | ND               | ND               |
|                  | NMEA             | ND                      | ND                | ND                | ND               | ND               |
|                  | NDEA             | <MDL                    | <MDL              | <MDL              | <MDL             | <MDL             |
|                  | NDPA             | ND                      | ND                | ND                | ND               | ND               |
|                  | NMOR             | ND                      | ND                | ND                | ND               | ND               |
|                  | NPYR             | ND                      | ND                | ND                | ND               | ND               |
|                  | NPIP             | <b>56.9±17.4</b>        | <b>66.5±0.99</b>  | <b>42.9±1.66</b>  | <b>53.0±7.02</b> | <b>47.8±14.7</b> |
|                  | NDBA             | 11.8±3.85               | ND                | ND                | 40.8±12.4        | ND               |
| <b>Total</b>     | <b>68.7±20.8</b> | <b>66.5±0.99</b>        | <b>42.9±1.66</b>  | <b>93.7±19.4</b>  | <b>47.8±14.7</b> |                  |
| Aldehydes (µg/L) | FD               | <b>4.18±5.74</b>        | <b>63.2±1.36</b>  | <b>82.9±6.38</b>  | <b>86.4±0.75</b> | 18.8±0.04        |
|                  | AD               | 3.93±2.61               | 4.47±0.32         | 4.54±0.49         | 5.31±0.19        | <b>107±2.66</b>  |
|                  | BD               | <MDL                    | ND                | ND                | <MDL             | <MDL             |
|                  | GX               | 2.25±1.04               | 5.51±0.03         | 8.15±0.81         | 6.77±0.26        | 8.07±0.17        |
|                  | MG               | 2.84±2.65               | <MDL              | <MDL              | <MDL             | 0.74±0.04        |
|                  | <b>Total</b>     | <b>11.0±6.67</b>        | <b>73.2±1.64</b>  | <b>95.5±6.70</b>  | <b>98.5±0.82</b> | <b>134±2.58</b>  |

**Table S4.** Concentrations (in ng DBP/g lettuce) of DBPs in fresh-cut lettuce with or without washing. The washing included tap water pre-wash (20 °C), then sanitizer wash (PAA, or NaOCl, 5 °C, pH 6), and final tap water post-wash (20 °C). ND = non-detectable.

| DBP Group    | DBP compound | Lettuce Background | PAA 45 mg/L      | PAA 85 mg/L      | PAA 100 mg/L     | NaOCl 100 mg/L   |
|--------------|--------------|--------------------|------------------|------------------|------------------|------------------|
| THMs         | CF           | <b>91.6</b>        | <b>145±3.93</b>  | <b>126±8.23</b>  | <b>242±23.4</b>  | <b>490±217</b>   |
|              | BF           | ND                 | ND               | ND               | ND               | ND               |
|              | BDCM         | ND                 | ND               | ND               | ND               | ND               |
|              | DBCM         | ND                 | ND               | ND               | ND               | ND               |
|              | <i>Total</i> | 91.6               | 145±3.93         | 126±8.23         | 242±23.4         | 490±217          |
| HAAs         | MCAA         | <b>21.7</b>        | <b>11.0±8.70</b> | <b>9.90±4.81</b> | <b>12.2±8.70</b> | 13.5±0.59        |
|              | MBAA         | ND                 | ND               | ND               | ND               | 8.09±0.49        |
|              | DCAA         | 1.00               | 6.41±0.06        | 1.92±0.03        | 3.00±0.17        | <b>354±19.4</b>  |
|              | TCAA         | 4.93               | 5.87±0.09        | 6.09±0.38        | 5.54±0.35        | 61.3±3.79        |
|              | BCAA         | ND                 | 3.75±3.94        | 7.57±4.08        | ND               | 4.95±0.53        |
|              | DBAA         | ND                 | ND               | ND               | ND               | <MDL             |
|              | BDCAA        | ND                 | ND               | ND               | ND               | 4.00±0.06        |
|              | CDBAA        | <MDL               | ND               | ND               | <MDL             | <MDL             |
|              | TBAA         | <MDL               | ND               | ND               | <MDL             | ND               |
| <i>Total</i> | 27.6         | 27.1±12.5          | 25.5±9.24        | 20.7±9.23        | 445±23.6         |                  |
| C-DBPs       | CH           | ND                 | <MDL             | <MDL             | <b>3.77±0.07</b> | 22.7±9.15        |
|              | DCPN         | ND                 | <MDL             | <MDL             | <MDL             | <b>37.3±17.1</b> |
|              | TCPN         | ND                 | ND               | ND               | ND               | 6.85±3.59        |
|              | TetraCPN     | ND                 | ND               | ND               | ND               | 24.3±10.4        |
|              | PentaCPN     | ND                 | ND               | ND               | ND               | ND               |
|              | DBCPCN       | <MDL               | <b>3.15±0.19</b> | <b>3.35±0.14</b> | 2.82             | 4.00±1.70        |
|              | TriCE        | ND                 | ND               | ND               | ND               | ND               |
|              | TCE          | ND                 | ND               | ND               | ND               | ND               |
|              | TCEL         | ND                 | ND               | ND               | ND               | ND               |
|              | CTC          | ND                 | ND               | ND               | <MDL             | ND               |
|              | DBE          | ND                 | ND               | ND               | ND               | ND               |
|              | <i>Total</i> | <MDL               | 3.15±0.19        | 3.35±0.14        | 5.18±1.92        | 95.2±41.9        |
| N-DBPs       | BNM          | ND                 | ND               | ND               | ND               | ND               |
|              | TCNM         | ND                 | ND               | ND               | ND               | ND               |
|              | DCAN         | ND                 | ND               | ND               | ND               | <MDL             |
|              | TCAN         | ND                 | ND               | ND               | ND               | ND               |
|              | BCAN         | ND                 | ND               | ND               | ND               | ND               |
|              | DBAN         | ND                 | <MDL             | <MDL             | <MDL             | ND               |
|              | DCAAm        | <b>53.7</b>        | <b>14.7±0.02</b> | <b>15.3±2.02</b> | <b>15.2±1.15</b> | <b>61.6±6.93</b> |
|              | TCAAm        | ND                 | ND               | ND               | ND               | <MDL             |
| <i>Total</i> | 53.7         | 14.7±0.02          | 15.3±2.02        | 15.2±1.15        | 61.6±6.93        |                  |
| NISAMs       | NDMA         | 0.18               | 0.19             | <b>0.43±0.21</b> | <b>0.39±0.02</b> | 0.22±0.06        |
|              | NMEA         | ND                 | ND               | ND               | ND               | ND               |
|              | NDEA         | ND                 | <MDL             | 0.18±0.21        | <MDL             | <MDL             |
|              | NDPA         | ND                 | ND               | ND               | ND               | ND               |
|              | NMOR         | <b>2.29</b>        | ND               | ND               | ND               | <b>0.74</b>      |
|              | NPYR         | ND                 | ND               | ND               | ND               | ND               |
| <i>Total</i> | 2.47         | 0.19               | 0.62±0.00        | 0.39±0.02        | 0.22±0.06        |                  |
| Aldehydes    | FD           | 21.5               | 38.7±0.79        | 42.5±0.76        | 35.9±4.44        | 43.8±5.57        |
|              | AD           | <b>94.9</b>        | <b>137±2.70</b>  | <b>136±0.51</b>  | <b>124±9.48</b>  | <b>106±5.43</b>  |
|              | BD           | 2.34               | 1.64±0.04        | 1.66±0.04        | 0.89±0.16        | 1.36±0.028       |
|              | GX           | 29.9               | 7.33±0.34        | 9.94±0.53        | 6.60±1.06        | 12.4±0.18        |
|              | MG           | 6.87               | 1.87±0.15        | 2.55±0.17        | 2.09±0.33        | 3.44±0.08        |
|              | <i>Total</i> | 155                | 186±2.45         | 192±1.93         | 170±15.5         | 167±0.70         |

**Table S5.** Concentrations of DBPs in the **post-wash** water samples. The post-wash samples were from tap water (20 °C) washing lettuce that was washed by different sanitizer solutions. ND = non-detectable.

| DBP Group           | DBP compound     | PAA<br>45 mg/L   | PAA<br>85 mg/L    | PAA<br>100 mg/L  | NaOCl<br>100 mg/L |
|---------------------|------------------|------------------|-------------------|------------------|-------------------|
| THMs<br>(µg/L)      | CF               | <b>27.8±0.27</b> | <b>42.4±2.88</b>  | <b>11.9±0.21</b> | <b>30.4±3.07</b>  |
|                     | BF               | <MDL             | <MDL              | <MDL             | <MDL              |
|                     | BDCM             | 6.79±0.07        | 8.10±0.19         | 7.66±0.13        | 9.57±0.68         |
|                     | DBCM             | 1.09±0.02        | 1.27±0.01         | 0.99±0.02        | 1.48±0.04         |
|                     | <b>Total</b>     | <b>35.6±0.33</b> | <b>51.7±3.08</b>  | <b>20.5±0.37</b> | <b>41.4±3.80</b>  |
| HAAs<br>(µg/L)      | MCAA             | 1.61±0.07        | 0.60±0.01         | 1.13±0.14        | 1.72±0.02         |
|                     | MBAA             | 0.19±0.02        | <MDL              | <MDL             | 0.27±0.002        |
|                     | DCAA             | <b>19.1±0.15</b> | 3.62±0.10         | 9.96±0.21        | <b>154±12.1</b>   |
|                     | TCAA             | 13.6±0.44        | <b>6.35±0.33</b>  | <b>12.6±0.36</b> | 20.7±0.26         |
|                     | BCAA             | 3.06±0.10        | 0.86±0.002        | 2.00±0.08        | 4.30±0.01         |
|                     | DBAA             | 0.32±0.01        | <MDL              | <MDL             | 0.38±0.001        |
|                     | BDCAA            | 1.86±0.03        | 0.84±0.02         | 1.56±0.11        | 2.18±0.08         |
|                     | CDBAA            | ND               | ND                | ND               | ND                |
|                     | TBAA             | 0.76±0.01        | 0.74±0.04         | 1.13±0.001       | 0.71±0.13         |
| <b>Total</b>        | <b>40.5±0.79</b> | <b>13.0±0.51</b> | <b>28.4±0.90</b>  | <b>184±12.6</b>  |                   |
| C-DBPs<br>(µg/L)    | CH               | <b>10.2±0.19</b> | <b>4.30±0.14</b>  | <b>12.7±0.25</b> | <b>10.7±0.36</b>  |
|                     | DCPN             | 0.92±0.01        | 0.61±0.01         | <MDL             | 1.17±0.07         |
|                     | TCPN             | 3.41±0.004       | 0.91±0.001        | 0.95±0.003       | 4.92±0.20         |
|                     | TetraCPN         | <MDL             | ND                | ND               | 5.73±1.04         |
|                     | PentaCPN         | ND               | ND                | ND               | ND                |
|                     | DBCPN            | <MDL             | ND                | ND               | <MDL              |
|                     | TriCE            | ND               | ND                | ND               | ND                |
|                     | TCE              | ND               | ND                | ND               | ND                |
|                     | TCEL             | <MDL             | ND                | ND               | ND                |
|                     | CTC              | ND               | <MDL              | ND               | ND                |
|                     | DBE              | 2.95±0.07        | 0.57±0.02         | 1.42±0.03        | 1.72±0.06         |
|                     | <b>Total</b>     | <b>17.5±0.27</b> | <b>6.39±0.15</b>  | <b>15.0±0.28</b> | <b>24.3±1.07</b>  |
| N-DBPs<br>(µg/L)    | BNM              | ND               | ND                | ND               | ND                |
|                     | TCNM             | 0.56±0.01        | 0.22±0.02         | 0.52±0.02        | 0.44±0.04         |
|                     | DCAN             | 2.31±0.01        | 1.26±0.001        | 1.99±0.02        | 11.0±0.08         |
|                     | TCAN             | ND               | ND                | ND               | ND                |
|                     | BCAN             | 0.69±0.004       | 0.17±0.02         | 0.52±0.01        | 1.01±0.03         |
|                     | DBAN             | <MDL             | <MDL              | <MDL             | <MDL              |
|                     | DCAAm            | <b>26.9±1.91</b> | <b>3.58±0.45</b>  | <b>3.22±0.33</b> | <b>338±10.9</b>   |
|                     | TCAAm            | 0.54±0.07        | 0.74±0.03         | 0.81±0.01        | 4.91±0.83         |
| <b>Total</b>        | <b>31.0±2.01</b> | <b>5.96±0.39</b> | <b>7.04±0.31</b>  | <b>355±11.6</b>  |                   |
| NISAMs<br>(ng/L)    | NDMA             | ND               | ND                | ND               | 27.5              |
|                     | NMEA             | ND               | ND                | ND               | ND                |
|                     | NDEA             | <MDL             | <MDL              | 15.1             | <MDL              |
|                     | NDPA             | ND               | ND                | ND               | ND                |
|                     | NMOR             | ND               | ND                | ND               | ND                |
|                     | NPYR             | ND               | ND                | ND               | ND                |
|                     | NPIP             | <b>45.6±14.4</b> | <b>33.9±4.86</b>  | <b>52.8±20.2</b> | <b>45.3±36.9</b>  |
|                     | NDBA             | <MDL             | <MDL              | 11.6±6.01        | 13.4              |
| <b>Total</b>        | <b>45.6±14.4</b> | <b>33.9±4.86</b> | <b>68.3±42.0</b>  | <b>65.8±26.8</b> |                   |
| Aldehydes<br>(µg/L) | FD               | <b>12.8±0.18</b> | <b>11.7±0.005</b> | <b>27.3±0.26</b> | 11.6±2.10         |
|                     | AD               | 12.1±0.06        | 11.6±0.60         | 22.1±0.95        | <b>19.6±0.10</b>  |
|                     | BD               | <MDL             | <MDL              | <MDL             | <MDL              |
|                     | GX               | 0.82±0.13        | 5.97±0.08         | 5.95±0.01        | 2.51±0.06         |
|                     | MG               | ND               | <MDL              | <MDL             | 0.79±0.005        |
|                     | <b>Total</b>     | <b>25.8±0.37</b> | <b>29.2±0.69</b>  | <b>55.3±1.22</b> | <b>34.5±2.26</b>  |
